# Supplementary material
Source: ML conference proceedings conference paper supplement (https://aclanthology.org/W18-2307)
Supplement: Notes [file supplementary_camera_ready.docx]

**Supplementary Data**


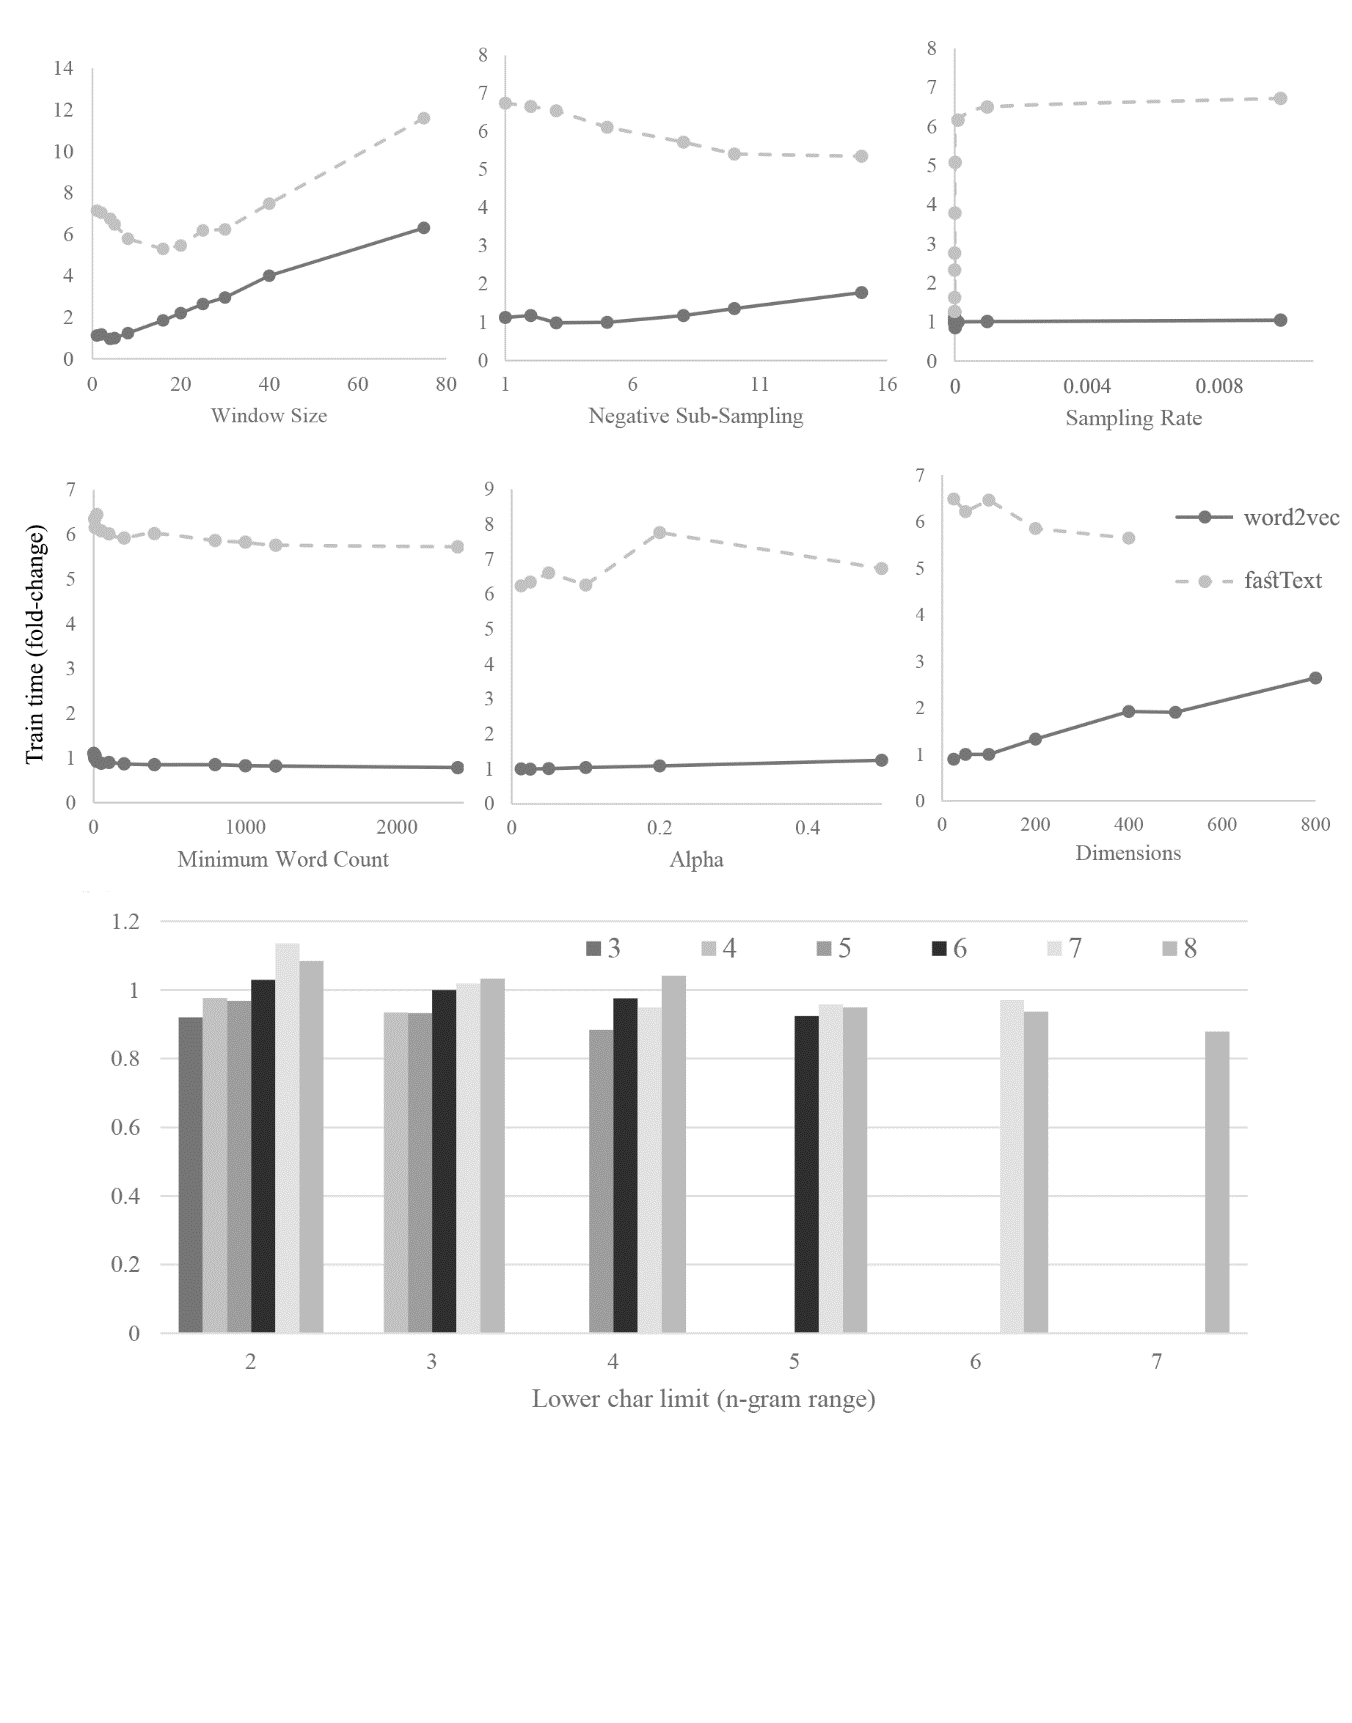
Supplementary Figure 1. Computational time for training Skip-Gram word2vec and fastText word embeddings at different hyper-parameter settings for: window size, negative sampling size, sub-sampling rate, minimum word count, alpha, and dimensionality. Plots are normalized with respect to the train time of word2vec when using default parameters (70-minute train time), and the default 3-6 character range in fastText (490-minute train time). Gensim’s implementation of word2vec and fastText was used.

Supplementary Table 1. Total number of PubMed tokens and unique tokens used to train the embedding models at 3 different word frequency thresholds: all tokens, minimum word frequency of 5 and 10.

| **Minimum word frequency threshold** | 0 | 5 | 10 |
| --- | --- | --- | --- |
| **Tokens** | 3,435,773,079 | 3,412,644,449 | 3,402,300,795 |
| **Vocabulary** | 19,099,369 | 3,410,473 | 1,806,181 |

Supplementary Table 2. Intrinsic similarity and relatedness corpora (UMNSRS, HDO and XADO) token statistics. Total number of tokens, total out-of-vocabulary (OOV) tokens, number of unique tokens, and unique OOV tokens for all tokens. OOV statistics are based on default minimum word count hyper-parameter of 5.

|  | **UMNSRS** | | **HDO** | | **XADO** | |
| --- | --- | --- | --- | --- | --- | --- |
| **sim** | **rel** | **sim** | **rel** | **sim** | **rel** |
| **Total tokens** | 898 | 916 | 79978 | 61182 | 306839 | 334633 |
| **Unique tokens** | 306 | 318 | 873 | 511 | 264 | 264 |
| **Total OOV tokens** | 7 | 9 | 2057 | 2984 | 3704 | 3704 |
| **Unique OOV tokens** | 3 | 4 | 32 | 24 | 3 | 3 |

Supplementary Figure 2. Percentage total and unique out-of-vocabulary (OOV) tokens for each intrinsic corpus (UMNSRS, HDO, and XADO). Percentage OOV tokens is with respect to "Total tokens", whereas percentage unique OOV tokens is with respect to "Unique tokens" ([Supplementary Table 2](#supp_table_2)).

Supplementary Table 3. Extrinsic corpora (CHEMDNER, JNLPBA, BC2GM) token statistics. Total number of tokens, total out-of-vocabulary (OOV) tokens, number of unique tokens, and unique OOV tokens for all tokens and entity tokens. OOV statistics are based on default minimum word count hyper-parameter of 5.

|  | **CHEMDNER** | | | **JNLPBA** | | | **BC2GM** | | |
| --- | --- | --- | --- | --- | --- | --- | --- | --- | --- |
| **train** | **dev** | **test** | **train** | **dev** | **test** | **train** | **dev** | **test** |
| **Total tokens** | 644195 | 639299 | 551617 | 446890 | 47661 | 101443 | 355405 | 71042 | 143465 |
| **Unique tokens** | 40996 | 40867 | 37245 | 20712 | 5679 | 9624 | 29774 | 11047 | 17344 |
| **Total OOV tokens** | 60293 | 58845 | 51586 | 53360 | 5767 | 13066 | 39173 | 7805 | 15883 |
| **Unique OOV tokens** | 12390 | 12568 | 10932 | 5841 | 1129 | 2124 | 7166 | 2033 | 3590 |
| **Total OOV entity tokens** | 8662 | 8326 | 7235 | 18153 | 1807 | 3850 | 6426 | 1287 | 2620 |
| **Unique OOV entity tokens** | 3299 | 3318 | 2837 | 2899 | 430 | 813 | 2312 | 608 | 1143 |

Supplementary Figure 3. Percentage total and unique out-of-vocabulary (OOV) tokens for each extrinsic corpus (CHEMDNER, JNLPBA, and BC2GM). Percentage OOV tokens is with respect to "Total tokens", whereas percentage unique OOV tokens is with respect to "Unique tokens" ([Supplementary Table 3](#supp_table_3)).

Supplementary Figure 4. Percentage total and unique out-of-vocabulary (OOV) entity tokens for each extrinsic corpus (CHEMDNER, JNLPBA, and BC2GM). Any token that was labeled as part of an entity in the original corpus (using the IOB scheme), was considered. Percentage OOV entity tokens is with respect to “Total OOV entity tokens”, whereas percentage unique OOV entity tokens is with respect to “Unique OOV entity tokens” ([Supplementary Table 3](#supp_table_3)).

Supplementary Table 4. **Effect of window size on intrinsic performance**. Intrinsic evaluation of word2vec (w2v) and fastText (FastT) word embedding models with various values for the “window size” hyper-parameter. Similarity and relatedness is represented by the Spearman correlation coefficient for the cosine similarity of term pairs and the reference standards. Out-of-vocabulary terms were considered and represented by a null vector for word2vec models. Asterisk (*) indicates default parameter value. Highest performance for each model and each standard is in **bold**.

| Win | **UMNSRS** | | | | **HDO** | | | | **XADO** | | | |
| --- | --- | --- | --- | --- | --- | --- | --- | --- | --- | --- | --- | --- |
| w2v | | FastT | | w2v | | FastT | | w2v | | FastT | |
| Sim | Rel | Sim | Rel | Sim | Rel | Sim | Rel | Sim | Rel | Sim | Rel |
| 1 | 0.492 | 0.446 | 0.411 | 0.415 | 0.232 | 0.188 | 0.262 | 0.210 | **0.055** | **0.119** | **0.068** | **0.117** |
| 2 | 0.533 | 0.485 | 0.457 | 0.454 | 0.258 | 0.210 | 0.287 | 0.213 | 0.046 | 0.109 | 0.057 | **0.117** |
| 4 | 0.570 | 0.512 | 0.481 | 0.479 | 0.273 | 0.223 | 0.305 | 0.218 | 0.035 | 0.102 | 0.046 | 0.113 |
| 5* | 0.580 | 0.528 | 0.497 | 0.491 | 0.279 | 0.224 | **0.311** | 0.220 | 0.032 | 0.105 | 0.043 | 0.113 |
| 8 | 0.614 | 0.558 | 0.528 | 0.517 | 0.283 | 0.229 | 0.301 | 0.214 | 0.035 | 0.104 | 0.044 | 0.115 |
| 16 | 0.647 | 0.596 | 0.552 | 0.552 | 0.280 | 0.231 | 0.302 | 0.223 | 0.038 | 0.103 | 0.042 | 0.113 |
| 20 | 0.654 | 0.601 | 0.563 | 0.565 | 0.284 | 0.230 | 0.300 | 0.230 | 0.044 | 0.101 | 0.040 | 0.108 |
| 25 | 0.651 | 0.603 | 0.571 | 0.564 | 0.289 | 0.236 | 0.301 | 0.229 | 0.049 | 0.103 | 0.041 | 0.109 |
| 30 | 0.663 | 0.618 | 0.574 | 0.571 | 0.289 | **0.237** | 0.302 | **0.232** | 0.054 | 0.104 | 0.033 | 0.105 |
| 40 | 0.670 | 0.624 | 0.583 | 0.578 | 0.297 | 0.233 | 0.302 | 0.227 | 0.050 | 0.099 | 0.023 | 0.099 |
| 75 | **0.675** | **0.639** | **0.596** | **0.586** | **0.301** | 0.229 | 0.290 | 0.225 | 0.041 | 0.100 | 0.020 | 0.095 |

Supplementary Table 5. **Effect of window size on extrinsic performance.** Extrinsic evaluation of word2vec (w2v) and fastText (FastT) word embedding models with various values for the “window size” hyper-parameter”. Accuracies represent F-score for named entity recognition of 3 corpora: BC2GM, JNLPBA, and CHEMDNER. Asterisk (*) indicates default parameter value. Highest performance for each model and each corpus is in **bold**.

| Win | **BC2GM** | | **JNLPBA** | | **CHEMDNER** | |
| --- | --- | --- | --- | --- | --- | --- |
| w2v | FastT | w2v | FastT | w2v | FastT |
| 1 | 78.10 | 79.37 | 76.99 | **78.64** | **88.34** | **89.89** |
| 2 | **78.61** | **79.51** | 77.09 | 78.29 | 87.89 | **89.89** |
| 4 | 77.68 | 79.26 | 76.29 | 77.14 | 87.45 | 89.62 |
| 5* | 77.64 | 79.31 | **77.18** | 77.52 | 87.74 | 89.38 |
| 8 | 76.81 | 79.14 | 76.84 | 77.22 | 87.98 | 89.40 |
| 16 | 77.84 | 78.88 | 76.58 | 77.33 | 87.60 | 89.09 |
| 20 | 76.70 | 79.25 | 76.82 | 76.61 | 87.80 | 88.96 |
| 25 | 76.93 | 78.40 | 76.40 | 77.23 | 87.70 | 88.75 |
| 30 | 77.97 | 78.42 | 76.21 | 76.91 | 87.95 | 88.82 |
| 40 | 77.33 | 77.66 | 76.35 | 76.88 | 87.55 | 88.50 |
| 75 | 76.19 | 78.58 | 76.69 | 76.86 | 87.51 | 88.67 |

Supplementary Table 6. **Effect of dimensionality on intrinsic performance.** Intrinsic evaluation of word2vec (w2v) and fastText (FastT) word embedding models with various values for the “dimension” hyper-parameter. Similarity and relatedness is represented by the Spearman correlation coefficient for the cosine similarity of term pairs and the 3 reference standards. Out-of-vocabulary terms were considered and represented by a null vector for word2vec models. Asterisk (*) indicates default parameter value. Highest performance for each model and each standard is in bold.

| Dim | **UMNSRS** | | | | **HDO** | | | | **XADO** | | | |
| --- | --- | --- | --- | --- | --- | --- | --- | --- | --- | --- | --- | --- |
| w2v | | FastT | | w2v | | FastT | | w2v | | FastT | |
| Sim | Rel | Sim | Rel | Sim | Rel | Sim | Rel | Sim | Rel | Sim | Rel |
| 25 | 0.507 | 0.457 | 0.424 | 0.433 | 0.254 | **0.234** | 0.263 | 0.216 | 0.036 | 0.105 | 0.043 | 0.104 |
| 50 | 0.568 | 0.519 | 0.471 | 0.477 | 0.268 | 0.229 | 0.296 | 0.216 | 0.031 | 0.099 | 0.035 | 0.106 |
| 100* | **0.584** | **0.528** | 0.498 | 0.493 | **0.277** | 0.223 | 0.306 | 0.215 | 0.034 | 0.102 | 0.043 | 0.113 |
| 200 | 0.581 | 0.526 | 0.509 | 0.508 | 0.266 | 0.222 | 0.308 | 0.225 | **0.049** | 0.106 | **0.065** | 0.121 |
| 400 | 0.582 | 0.527 | 0.500 | 0.505 | 0.243 | 0.210 | 0.295 | 0.219 | 0.035 | **0.107** | 0.064 | **0.127** |
| 500 | 0.580 | 0.522 | **0.538** | **0.531** | 0.233 | 0.203 | **0.317** | **0.228** | 0.037 | 0.104 | 0.063 | 0.125 |
| 800 | 0.574 | 0.510 | 0.532 | 0.523 | 0.214 | 0.192 | 0.309 | 0.220 | 0.034 | 0.101 | 0.063 | 0.125 |

| Dim | **BC2GM** | | **JNLPBA** | | **CHEMDNER** | |
| --- | --- | --- | --- | --- | --- | --- |
| w2v | FastT | w2v | FastT | w2v | FastT |
| 25 | 75.57 | 75.77 | 76.56 | 77.37 | 88.63 | 89.26 |
| 50 | 77.80 | 77.23 | 76.54 | 77.88 | 87.87 | 89.49 |
| 100* | 77.12 | **79.50** | 76.83 | **78.10** | **87.94** | **89.60** |
| 200 | **77.91** | 79.01 | **76.88** | 77.28 | 87.34 | 89.42 |
| 400 | 75.28 | 77.56 | 75.50 | 77.50 | 86.99 | 89.07 |
| 500 | 75.76 | 78.07 | 76.31 | 76.90 | 87.18 | 88.89 |
| 800 | 76.23 | 77.41 | 76.57 | 77.17 | 87.02 | 88.91 |

Supplementary Table 7. **Effect of dimensionality on extrinsic performance.** Extrinsic evaluation of word2vec (w2v) and fastText (FastT) word embedding models with various values for the “dimension” hyper-parameter. Accuracies represent F-score for named entity recognition. Asterisk (*) indicates default parameter value. Highest performance for each model and each corpus is in bold.

Supplementary Table 8. **Effect of negative sampling on intrinsic performance.** Intrinsic evaluation of word2vec (w2v) and fastText (FastT) word embedding models with various values for the “negative sub-sampling” hyper-parameter. Similarity and relatedness is represented by the Spearman correlation coefficient for the cosine similarity of term pairs and the 3 reference standards. Out-of-vocabulary terms were considered and represented by a null vector for word2vec models. Asterisk (*) indicates default parameter value. Highest performance for each model and each standard is in **bold**.

| Neg | **UMNSRS** | | | | **HDO** | | | | **XADO** | | | |
| --- | --- | --- | --- | --- | --- | --- | --- | --- | --- | --- | --- | --- |
| w2v | | FastT | | w2v | | FastT | | w2v | | FastT | |
| Sim | Rel | Sim | Rel | Sim | Rel | Sim | Rel | Sim | Rel | Sim | Rel |
| 1 | 0.575 | 0.529 | 0.466 | 0.471 | 0.275 | 0.200 | 0.297 | 0.215 | 0.028 | **0.118** | 0.042 | 0.113 |
| 2 | 0.579 | 0.527 | 0.485 | 0.483 | 0.272 | 0.214 | 0.304 | **0.220** | 0.034 | 0.106 | 0.045 | **0.115** |
| 3 | 0.584 | 0.524 | 0.494 | 0.488 | 0.266 | 0.226 | 0.307 | 0.214 | 0.033 | 0.105 | **0.050** | **0.115** |
| 5* | 0.582 | 0.524 | 0.493 | 0.490 | 0.277 | 0.226 | 0.306 | 0.218 | 0.033 | 0.103 | 0.046 | 0.110 |
| 8 | **0.587** | 0.528 | 0.504 | **0.499** | 0.276 | 0.226 | 0.303 | 0.216 | 0.037 | 0.106 | 0.044 | 0.112 |
| 10 | **0.587** | 0.532 | **0.507** | 0.498 | **0.283** | 0.226 | 0.302 | 0.216 | 0.041 | 0.103 | 0.048 | 0.113 |
| 15 | 0.585 | **0.533** | 0.504 | 0.498 | 0.281 | **0.229** | **0.308** | 0.217 | **0.042** | 0.102 | 0.047 | 0.112 |

Supplementary Table 9. **Effect of negative sampling on extrinsic performance.** Extrinsic evaluation of word2vec (w2v) and fastText (FastT) word embedding models with various values for the “negative sub-sampling” hyper-parameter”. Accuracies represent F-score for named entity recognition of 3 corpora: BC2GM, JNLPBA, and CHEMDNER. Asterisk (*) indicates default parameter value. Highest performance for each model and each corpus is in bold.

| Neg | **BC2GM** | | **JNLPBA** | | **CHEMDNER** | |
| --- | --- | --- | --- | --- | --- | --- |
| w2v | FastT | w2v | FastT | w2v | FastT |
| 1 | 77.11 | 78.10 | 77.09 | 77.00 | 87.74 | 89.53 |
| 2 | 76.78 | 79.52 | 76.90 | 77.71 | **87.96** | 89.50 |
| 3 | 77.48 | 79.40 | 77.30 | 77.96 | 87.79 | 89.64 |
| 5* | **78.87** | 78.36 | 76.67 | 78.23 | 87.94 | 89.50 |
| 8 | 77.04 | 79.35 | 76.87 | 77.60 | 87.81 | 89.63 |
| 10 | 78.23 | **80.00** | 76.70 | 78.10 | 87.91 | 89.58 |
| 15 | 77.85 | 79.22 | **77.68** | **78.26** | 87.70 | **89.66** |

Supplementary Table 10. **Effect of minimum word count on intrinsic performance.** Intrinsic evaluation of word2vec (w2v) and fastText (FastT) word embedding models with various values for the “minimum word count” hyper-parameter. Similarity and relatedness is represented by the Spearman correlation coefficient for the cosine similarity of term pairs and the 3 reference standards. Out-of-vocabulary terms were considered and represented by a null vector for word2vec models. Asterisk (*) indicates default parameter value. Highest performance for each model and each standard is in bold.

| Min-count | **UMNSRS** | | | | **HDO** | | | | **XADO** | | | |
| --- | --- | --- | --- | --- | --- | --- | --- | --- | --- | --- | --- | --- |
| w2v | | FastT | | w2v | | FastT | | w2v | | FastT | |
| Sim | Rel | Sim | Rel | Sim | Rel | Sim | Rel | Sim | Rel | Sim | Rel |
| 0 | **0.604** | **0.542** | **0.499** | **0.498** | **0.291** | **0.234** | **0.327** | **0.101** | **0.062** | 0.102 | 0.064 | 0.101 |
| 5* | 0.583 | 0.526 | 0.496 | 0.493 | 0.275 | 0.229 | 0.306 | 0.220 | 0.039 | 0.106 | 0.038 | 0.110 |
| 10 | 0.567 | 0.504 | 0.494 | 0.488 | 0.251 | 0.200 | 0.269 | 0.181 | 0.025 | 0.108 | 0.033 | 0.117 |
| 20 | 0.550 | 0.497 | 0.494 | 0.490 | 0.264 | 0.177 | 0.274 | 0.164 | 0.032 | 0.115 | 0.037 | 0.122 |
| 50 | 0.545 | 0.512 | 0.495 | 0.496 | 0.240 | 0.138 | 0.253 | 0.135 | -0.003 | 0.131 | 0.011 | 0.130 |
| 100 | 0.527 | 0.514 | 0.481 | 0.483 | 0.197 | 0.090 | 0.199 | 0.086 | 0.034 | **0.138** | 0.040 | **0.136** |
| 200 | 0.445 | 0.450 | 0.425 | 0.438 | 0.181 | 0.100 | 0.186 | 0.092 | 0.052 | 0.099 | 0.050 | 0.102 |
| 400 | 0.426 | 0.407 | 0.418 | 0.406 | 0.165 | 0.056 | 0.164 | 0.054 | 0.060 | 0.092 | 0.056 | 0.097 |
| 800 | 0.386 | 0.388 | 0.383 | 0.380 | 0.123 | 0.046 | 0.125 | 0.045 | 0.069 | 0.073 | 0.067 | 0.074 |
| 1000 | 0.378 | 0.365 | 0.376 | 0.358 | 0.115 | 0.047 | 0.116 | 0.044 | 0.076 | 0.060 | 0.074 | 0.062 |
| 1200 | 0.380 | 0.366 | 0.372 | 0.354 | 0.067 | 0.067 | 0.117 | 0.065 | 0.079 | 0.065 | 0.076 | 0.065 |
| 2400 | 0.329 | 0.356 | 0.327 | 0.349 | 0.122 | 0.070 | 0.121 | 0.069 | 0.088 | 0.065 | **0.084** | 0.066 |

Supplementary Table 11. **Effect of minimum word count on extrinsic performance.** Extrinsic evaluation of word2vec (w2v) and fastText (FastT) word embedding models with various values for the “minimum word count” hyper-parameter. Accuracies represent F-score for named entity recognition of 3 corpora: BC2GM, JNLPBA, and CHEMDNER. Asterisk (*) indicates default parameter value. Highest performance for each model and each corpus is in bold.

| Min-count | **BC2GM** | | **JNLPBA** | | **CHEMDNER** | |
| --- | --- | --- | --- | --- | --- | --- |
| w2v | FastT | w2v | FastT | w2v | FastT |
| 0 | 77.40 | 78.10 | 76.64 | 77.80 | **87.99** | 89.54 |
| 5* | **77.50** | 79.07 | 76.80 | **78.59** | 87.84 | **89.83** |
| 10 | 77.34 | 79.46 | **77.34** | 77.64 | 87.55 | 89.56 |
| 20 | 76.97 | 79.45 | 76.35 | 78.22 | 87.71 | 89.35 |
| 50 | 77.36 | **79.49** | 76.35 | 77.29 | 87.67 | 89.08 |
| 100 | 77.04 | 78.33 | 76.89 | 76.96 | 87.73 | 88.81 |
| 200 | 76.20 | 78.06 | 77.10 | 77.31 | 86.97 | 88.76 |
| 400 | 76.52 | 77.81 | 76.25 | 77.52 | 86.56 | 88.45 |
| 800 | 76.68 | 76.31 | 76.33 | 77.27 | 86.13 | 88.33 |
| 1000 | 76.25 | 78.62 | 76.43 | 76.67 | 85.97 | 88.19 |
| 1200 | 75.87 | 76.8 | 75.90 | 78.07 | 85.77 | 87.72 |
| 2400 | 74.97 | 77.47 | 76.34 | 77.32 | 85.34 | 87.53 |

Supplementary Table 12. **Effect of sampling rate on intrinsic performance.** Intrinsic evaluation of word2vec (w2v) and fastText word embedding models with various values for the “sampling rate” hyper-parameter. Similarity and relatedness is represented by the Spearman correlation coefficient for the cosine similarity of term pairs and the 3 reference standards. Out-of-vocabulary terms were considered and represented by a null vector for word2vec models. Asterisk (*) indicates default parameter value. Highest performance for each model and each standard is in bold.

| Samp | **UMNSRS** | | | | **HDO** | | | | **XADO** | | | |
| --- | --- | --- | --- | --- | --- | --- | --- | --- | --- | --- | --- | --- |
| w2v | | FastT | | w2v | | FastT | | w2v | | FastT | |
| Sim | Rel | Sim | Rel | Sim | Rel | Sim | Rel | Sim | Rel | Sim | Rel |
| 0 | 0.561 | 0.502 | 0.476 | 0.472 | 0.268 | 0.221 | 0.295 | 0.220 | 0.037 | 0.103 | 0.048 | 0.110 |
| 1e-10 | 0.052 | 0.138 | 0.058 | 0.097 | 0.023 | 0.000 | 0.036 | 0.003 | 0.047 | 0.013 | 0.048 | 0.030 |
| 1e-9 | -0.008 | 0.003 | 0.166 | 0.110 | -0.057 | -0.024 | 0.049 | 0.061 | -0.086 | 0.036 | 0.020 | 0.074 |
| 1e-8 | 0.192 | 0.166 | 0.401 | 0.373 | 0.053 | 0.076 | 0.196 | 0.180 | 0.037 | 0.094 | -0.031 | 0.072 |
| 1e-7 | 0.605 | 0.550 | 0.556 | 0.542 | 0.266 | 0.192 | 0.268 | 0.191 | 0.013 | 0.097 | -0.007 | 0.089 |
| 1e-6 | **0.646** | **0.601** | **0.559** | **0.571** | 0.283 | 0.201 | 0.302 | 0.213 | **0.055** | 0.095 | 0.049 | 0.094 |
| 1e-5 | 0.645 | 0.584 | 0.544 | 0.552 | **0.288** | 0.219 | **0.314** | 0.216 | 0.051 | 0.100 | **0.057** | 0.103 |
| 1e-4 | 0.609 | 0.553 | 0.518 | 0.509 | 0.280 | 0.225 | 0.309 | **0.218** | 0.049 | 0.101 | 0.056 | **0.114** |
| 1e-3* | 0.579 | 0.517 | 0.502 | 0.494 | 0.279 | **0.226** | 0.306 | 0.217 | 0.039 | 0.102 | 0.046 | 0.113 |
| 1e-2 | 0.563 | 0.507 | 0.487 | 0.482 | 0.272 | 0.220 | 0.301 | 0.216 | 0.033 | **0.105** | 0.047 | 0.113 |
| 1e-1 | 0.558 | 0.501 | 0.479 | 0.479 | 0.266 | 0.220 | 0.295 | 0.217 | 0.031 | 0.102 | 0.049 | 0.111 |

Supplementary Table 13. **Effect of sampling rate on extrinsic performance.** Extrinsic evaluation of word2vec (w2v) and fastText word embedding models with various values for the “sampling rate” hyper-parameter. Accuracies represent F-score for named entity recognition of 3 corpora: BC2GM, JNLPBA, and CHEMDNER. Asterisk (*) indicates default parameter value. Highest performance for each model and each corpus is in bold.

| Samp | **BC2GM** | | **JNLPBA** | | **CHEMDNER** | |
| --- | --- | --- | --- | --- | --- | --- |
| w2v | FastT | w2v | FastT | w2v | FastT |
| 0 | **78.10** | 78.27 | 76.48 | **78.80** | 87.38 | 89.57 |
| 1e-10 | 69.92 | 73.09 | 74.92 | 75.71 | 82.44 | 83.53 |
| 1e-9 | 69.79 | 76.16 | 73.84 | 77.29 | 81.25 | 87.24 |
| 1e-8 | 71.54 | 77.76 | 76.38 | 77.37 | 83.19 | 88.88 |
| 1e-7 | 76.74 | 78.04 | **78.48** | 77.20 | 86.70 | 89.10 |
| 1e-6 | 76.64 | 78.11 | 76.45 | 77.77 | 87.50 | 89.33 |
| 1e-5 | 77.59 | 78.57 | 77.19 | 78.52 | 87.84 | 89.48 |
| 1e-4 | 76.53 | 78.61 | 76.97 | 77.60 | 87.84 | **89.64** |
| 1e-3* | 77.73 | **80.57** | 76.85 | 78.31 | **88.18** | 89.45 |
| 1e-2 | 77.66 | 80.53 | 76.58 | 78.07 | 88.06 | 89.63 |
| 1e-1 | 77.11 | 79.76 | 77.49 | 77.68 | 87.78 | 89.45 |

Supplementary Table 14. **Effect of learning rate (alpha) on intrinsic performance.** Intrinsic evaluation of word2vec (w2v) and fastText (FastT) word embedding models with various values for the “learning rate (alpha)” hyper-parameter. Similarity and relatedness is represented by the Spearman correlation coefficient for the cosine similarity of term pairs and the 3 reference standards. Out-of-vocabulary terms were considered and represented by a null vector for word2vec models. Asterisk (*) represents default parameter value. Highest performance for each model and each standard is in bold.

| Alpha | **UMNSRS** | | | | **HDO** | | | | **XADO** | | | |
| --- | --- | --- | --- | --- | --- | --- | --- | --- | --- | --- | --- | --- |
| w2v | | FastT | | w2v | | FastT | | w2v | | FastT | |
| Sim | Rel | Sim | Rel | Sim | Rel | Sim | Rel | Sim | Rel | Sim | Rel |
| 0.0125 | 0.570 | 0.511 | 0.466 | 0.472 | 0.251 | 0.204 | 0.290 | 0.216 | **0.041** | 0.106 | 0.056 | 0.102 |
| 0.025* | 0.582 | 0.523 | 0.500 | 0.496 | 0.272 | **0.224** | **0.308** | **0.221** | 0.036 | 0.102 | 0.049 | 0.112 |
| 0.05 | 0.601 | 0.546 | 0.528 | 0.517 | 0.303 | 0.220 | 0.306 | 0.216 | 0.027 | 0.110 | 0.041 | **0.118** |
| 0.1 | **0.602** | **0.578** | **0.545** | **0.528** | **0.306** | 0.204 | 0.299 | 0.216 | 0.025 | **0.115** | 0.032 | **0.118** |
| 0.2 | 0.008 | 0.070 | 0.107 | 0.091 | 0.013 | 0.006 | 0.048 | 0.163 | 0.021 | 0.035 | **0.073** | -0.011 |
| 0.5 | -0.013 | 0.062 | 0.035 | 0.012 | -0.006 | 0.026 | 0.047 | 0.098 | 0.029 | 0.015 | -0.035 | 0.028 |

| Alpha | **BC2GM** | | **JNLPBA** | | **CHEMDNER** | |
| --- | --- | --- | --- | --- | --- | --- |
| w2v | FastT | w2v | FastT | w2v | FastT |
| 0.0125 | 77.23 | 78.94 | 76.79 | 77.71 | 87.61 | 89.55 |
| 0.025* | **79.14** | 78.85 | 76.87 | **77.80** | 87.62 | **89.68** |
| 0.05 | 77.61 | 78.89 | 76.87 | 77.05 | **88.04** | 88.87 |
| 0.1 | 78.38 | **79.02** | **77.45** | 77.28 | 87.85 | 89.10 |
| 0.2 | 60.53 | 56.53 | 68.91 | 65.27 | 83.16 | 76.91 |
| 0.5 | 61.19 | 51.01 | 69.17 | 62.58 | 82.80 | 79.42 |

Supplementary Table 15. **Effect of learning rate (alpha) on extrinsic performance.** Extrinsic evaluation of word2vec (w2v) and fastText (FastT) word embedding models with various values for the “learning rate (alpha)” hyper-parameter. Accuracies represent F-score for named entity recognition of 3 corpora: BC2GM, JNLPBA, and CHEMDNER. Asterisk (*) represents default parameter value. Highest performance for each model and each corpus is in bold.

Supplementary Table 16. Top 5 most similar words to *phosphatidylinositol-4,5-bisphosphate*. fastText identifies syntactically similar terms which also refer to structurally similar molecules. Word2vec identifies less syntactically similar terms but recalls abbreviated forms, where *PIP2* and *PtdIns(4,5)P2* are synonyms to the queried term.

| **word2vec** | **fastText** |
| --- | --- |
| 4,5-bisphosphate | phosphatidylinositol-4,5-biphosphate |
| phosphatidylinositol | phosphatidylinositol-(4,5)-bisphosphate |
| 4,5)-bisphosphate | phosphatidylinositol-4-phosphate |
| PIP2 | 4,5-bisphosphate |
| PtdIns(4,5)P2 | phosphatidylinositol-4 |

Supplementary Table 17. Top 10 most similar words to the rare genetic skeletal malformations disorder *acrodysostosis*. Albright’s hereditary osteodystrophy (*Albright_hereditary_osteodystrophy*) and McCune-Albright Syndrome (*McCune_Albright_syndrome*) are genetic disorders effecting the bone, skin and endocrine system. *Dysostosis* and *pycnodysostosis* are disorders concerning bone development.

| **word2vec** | **fastText** |
| --- | --- |
| Albright_hereditary_osteodystrophy | dysostosis |
| Familial_glucocorticoid_deficiency | pycnodysostosis |
| McCune_Albright_syndrome | pyknodysostosis |
| McCune_-Albright | dysostoses |
| Melnick_Needles_syndrome | spondyloenchondrodysplasia |
| Hypochondroplasia | hereditary_multiple_exostosis |
| Hajdu-Cheney | alright_hereditary_osteodystrophy |
| PHP-la | pseudoachondroplasia |
| NFNS | chondrodysplasia |
| PHP1A | macrodystrophia |

Supplementary Table 18. Top 5 most similar terms to the out-of-vocabulary genetic variant (SNP): *LRG_1:g.8463G>C*. Reference SNPs are denoted by the *RS*- prefix in their respective database accessions.

| rs2243250 |
| --- |
| rs2241880 |
| rs3212227 |
| rs3212986 |
| rs3748067 |

Supplementary Table 19. Top 10 words most similar to the SNP rs2243250, which is Interleukin 4 – 590C/T polymorphism. In addition to Reference SNP identifiers, word2vec recalls the 590C/T alteration within the first 10 terms, whereas fastText only identifies Reference SNP identifiers.

| **word2vec** | **fastText** |
| --- | --- |
| Rs2070874 | Rs1800896 |
| Rs1800871 | Rs2275913 |
| Rs8193036 | Rs2430561 |
| Rs1800872 | Rs2241880 |
| Rs20541 | Rs2070874 |
| Rs2243248 | Rs1800925 |
| Rs2227284 | Rs2228145 |
| Rs4711998 | Rs1143634 |
| **590C>T** | Rs1800872 |
| **590C/T** | Rs1143627 |

Supplementary Table 20. Top 10 most similar words to ZNF580 – Zinc Finger Protein 580.

| **word2vec** | **fastText** |
| --- | --- |
| hCTGF | ZNF545 |
| Focal_adhesional_kinase | ZNF582 |
| Tmfn2 | ZNF521 |
| Deltanp63a | ZNF24 |
| RTEF-1 | ZNF202 |
| p-CREB-1 | ZNF32 |
| ITGa5 | ZNF217 |
| BMP9-dependent | BTG1 |
| Ox-LDL-injured | ZNF281 |
| IGFBP-3-mediated | ZNF703 |

Supplementary Table 21. Top 10 most similar words to 1,2-dichloroethane returned by word2vec and fastText models.

| **word2vec** | **fastText** |
| --- | --- |
| 1,1,1,2,2-tetrachloroethane | dichloroethane |
| 1,1,2-trichloroethane | Water/1,2-dichloroethane |
| chlorobenzene | 1,1-dichloroethane |
| 1,2-dichlorobenzene | 1,1,2-trichloroethane |
| 1,4-dioxane | 1,2-dichlorobenzene |
| nitrobezene | chloroethane |
| dichloroethane | cis-1,2-dichloroethene |
| Toluene | 1,1,2,2-tetrachloroethane |
| 1,1-dichloroethene | trichloroethane |
| tetrachloroethane | Trans-1,2-dichloroethylene |

Supplementary Table 22. Top 10 most similar words to zinc_finger_protein returned by word2vec and fastText models.

| **word2vec** | **fastText** |
| --- | --- |
| Zinc-finger | Zinc_finger_proteins |
| ZFP | RET_finger_protein |
| cGATA-1 | Zinc_finger |
| Neural-restrictive | Ret_finger_protein |
| Six-zinc | Zinc_fingers |
| SZF1 | Zinc-finger |
| SP/KLF | ZFP |
| Six-finger | KRAB |
| GAGA-like | KRAB-ZFPs |
| UtroUp | KRAB-ZFP |

Supplementary Table 23. Variation (standard deviation) in the intrinsic accuracy for the default parameters. Models were run independently during parameter optimization.

| **Source Parameter Table** | Word2vec | | | FastText | | |
| --- | --- | --- | --- | --- | --- | --- |
| BC2GM | JNLPBA | CHEMDNER | BC2GM | JNLPBA | CHEMDNER |
| Window | 77.64 | 77.18 | 87.74 | 79.31 | 77.52 | 89.38 |
| Negative sub-sampling | 78.87 | 76.67 | 87.94 | 78.36 | 78.23 | 89.50 |
| Sampling rate | 77.73 | 76.85 | 88.18 | 80.57 | 78.31 | 89.45 |
| Min-count | 77.50 | 76.8 | 87.84 | 79.07 | 78.59 | 89.83 |
| Alpha | 79.14 | 76.87 | 87.62 | 78.85 | 77.80 | 89.68 |
| Dimensionality | 77.12 | 76.83 | 87.94 | 79.50 | 78.10 | 89.60 |
| Stdev | 0.81 | 0.17 | 0.19 | 0.75 | 0.38 | 0.16 |

| **Source Parameter Table** | **UMNSRS** | | | | **HDO** | | | | **XADO** | | | |
| --- | --- | --- | --- | --- | --- | --- | --- | --- | --- | --- | --- | --- |
| **w2v** | | **FastT** | | **w2v** | | **FastT** | | **w2v** | | **FastT** | |
| Sim | Rel | Sim | Rel | Sim | Rel | Sim | Rel | Sim | Rel | Sim | Rel |
| Window | 0.58 | 0.528 | 0.497 | 0.491 | 0.279 | 0.224 | 0.311 | 0.22 | 0.032 | 0.105 | 0.043 | 0.113 |
| Negative | 0.582 | 0.524 | 0.493 | 0.49 | 0.277 | 0.226 | 0.306 | 0.218 | 0.033 | 0.103 | 0.046 | 0.11 |
| Sampling | 0.579 | 0.517 | 0.502 | 0.494 | 0.279 | 0.226 | 0.306 | 0.217 | 0.039 | 0.102 | 0.046 | 0.113 |
| Min-Count | 0.583 | 0.526 | 0.496 | 0.493 | 0.275 | 0.229 | 0.306 | 0.22 | 0.039 | 0.106 | 0.038 | 0.11 |
| Alpha | 0.582 | 0.523 | 0.5 | 0.496 | 0.272 | 0.224 | 0.308 | 0.221 | 0.036 | 0.102 | 0.049 | 0.112 |
| Dimensionality | 0.584 | 0.528 | 0.498 | 0.493 | 0.277 | 0.223 | 0.306 | 0.215 | 0.034 | 0.102 | 0.043 | 0.113 |
| Epochs | 0.58 | 0.522 | 0.495 | 0.495 | 0.271 | 0.222 | 0.307 | 0.216 | 0.036 | 0.106 | 0.047 | 0.112 |
| Stdev | 0.002 | 0.004 | 0.003 | 0.002 | 0.003 | 0.002 | 0.002 | 0.002 | 0.003 | 0.002 | 0.004 | 0.001 |

Supplementary Table 24. Variation (standard deviation) in the extrinsic accuracy for the default parameters for the word2vec (w2v) and fastText (FastT) models. Models were run independently during parameter optimization.

Supplementary Table 25. Word2vec (w2v) and fastText (FastT) optimized hyper-parameters for each intrinsic standard and extrinsic corpus.

|  | UMNSRS | | HDO | | XADO | | BC2GM | | JNLPBA | | CHEMDNER | |
| --- | --- | --- | --- | --- | --- | --- | --- | --- | --- | --- | --- | --- |
|  | w2v | FastT | w2v | FastT | w2v | FastT | w2v | FastT | w2v | FastT | w2v | FastT |
| Window | 75 | 75 | 40 | 30 | 1 | 1 | 2 | 2 | 5 | 1 | 1 | 1 |
| Negative | 10 | 10 | 15 | 2 | 15 | 10 | 5 | 10 | 15 | 15 | 2 | 10 |
| Sampling | 1e-6 | 1e-6 | 1e-5 | 1e-5 | 1e-6 | 1e-4 | 0 | 1e-3 | 1e-7 | 0 | 1e-3 | 1e-3 |
| Min-count | 0 | 0 | 0 | 5 | 0 | 0 | 5 | 50 | 10 | 5 | 0 | 5 |
| Alpha | 0.1 | 0.1 | 0.05 | 0.025 | 0.0125 | 0.0125 | 0.025 | 0.1 | 0.1 | 0.025 | 0.05 | 0.025 |
| Dim | 100 | 500 | 100 | 500 | 200 | 400 | 200 | 100 | 200 | 100 | 100 | 100 |
| N_grams | - | 5-7 / 6-7 | - | 6-8 | - | 3-4 | - | 2-6 / 3-8 | - | 3-7 | - | 3-7 |

Supplementary Table 26. Intrinsic and extrinsic performance for the word2vec (w2v) and fastText (FastT) embeddings trained with the per-corpus optimized hyper-parameters (Supplementary Table 25). Highest performance for each model and each standard is in bold.

| Model | UMNSRS | | HDO | | XADO | | BC2GM | JNLPBA | CHEMDNER |
| --- | --- | --- | --- | --- | --- | --- | --- | --- | --- |
| Sim | Rel | Sim | Rel | Sim | Rel |
| w2v | **0.733** | **0.686** | **0.324** | 0.234 | 0.061 | **0.110** | 76.83 | 72.03 | 88.26 |
| FastText | 0.541/ 0.581 | 0.507/ 0.520 | 0.306 | **0.235** | **0.090** | 0.089 | **79.33** / 78.85 | **73.30** | **90.54** |

Supplementary Table 27. Optimized word2vec (w2v) and fastText (FastT) hyper-parameters across intrinsic standards and extrinsic corpora.

|  | Optimized on intrinsic standards | | Optimized on extrinsic corpora | |
| --- | --- | --- | --- | --- |
| w2v | FastT | w2v | FastT |
| Window | 30 | 25 | 2 | 1 |
| Negative | 15 | 3 | 5 | 10 |
| Sampling | 1e-5 | 1e-5 | 1e-3 | 1e-3 |
| Min-count | 0 | 0 | 10 | 5 |
| Alpha | 0.05 | 0.05 | 0.1 | 0.025 |
| Dim | 200 | 200 | 50 | 100 |
| N_grams | - | 6-7 | - | 3-7 |

Supplementary Table 28. word2vec (w2v) and fastText (FastT) hyper-parameters optimized across intrinsic and extrinsic datasets.

|  | w2v | FastT |
| --- | --- | --- |
| Window | 30 | 25 |
| Negative | 15 | 10 |
| Sampling | 1e-5 | 1e-5 |
| Min-count | 0 | 0 |
| Alpha | 0.025 | 0.025 |
| Dim | 200 | 200 |
| N_grams | - | 6-7 |

Supplementary Table 29. Intrinsic and extrinsic performance for word2vec and fastText embeddings optimized on global optima of hyper-parameters across all corpora and standards ([Supplementary Table 28](#supp_table_28)).

|  | UMNSRS | | HDO | | XADO | | BC2GM | JNLPBA | CHEMDNER |
| --- | --- | --- | --- | --- | --- | --- | --- | --- | --- |
| Sim | Rel | Sim | Rel | Sim | Rel |
| word2vec | 0.707 | 0.657 | 0.296 | **0.251** | **0.094** | 0.072 | *76.04* | *72.74* | 87.53 |
| fastText | **0.721** | **0.674** | **0.329** | 0.241 | 0.077 | **0.088** | **76.76** | **72.79** | **89.11** |
